# Supplementary material
Source: PubMed Central journal article supplement (PMC4326032)
Supplement: Supp_Data.pdf [file Supp_Data.pdf]

## Supplemental data

S1: Relationship between inhibited reactions and predecessors of C00022 in  $N_1$  and  $N_2$  in Dataset 1.

| Node   | Predecessors |       | IP-FVS1     | IP-FVS2 | IP-EM |
|--------|--------------|-------|-------------|---------|-------|
| R00200 | $N_1$        | $N_2$ | -           | -       | -     |
| R00703 | $N_1$        | $N_2$ | -           | -       | -     |
| R05605 | $N_1$        | -     | -           | -       | ko    |
| R04779 | -            | -     | -           | ko      | ko    |
| R01541 | -            | -     | -           | ko      | -     |
| size   | 3            | 2     | no solution | 2       | 2     |

S2: Relationship between inhibited reactions and predecessors of C00074 in  $N_1$  and  $N_2$  in Dataset 1.

| Node   | Predecessors |       | IP-FVS1     | IP-FVS2 | IP-EM |
|--------|--------------|-------|-------------|---------|-------|
| R00658 | $N_1$        | $N_2$ | -           | -       | -     |
| R04779 | -            | -     | -           | ko      | ko    |
| R01541 | -            | -     | -           | ko      | -     |
| size   | 1            | 1     | no solution | 2       | 1     |

S3: Relationship between knocked-out nodes and predecessors of all the above 5 compounds are targets in Data1

| Node   | Predecessors |       | IP-FVS1     | IP-FVS2     | IP-EM |
|--------|--------------|-------|-------------|-------------|-------|
| R00200 | $N_1$        | $N_2$ | -           | -           | -     |
| R00658 | $N_1$        | $N_2$ | -           | -           | -     |
| R00703 | $N_1$        | $N_2$ | -           | -           | -     |
| R00710 | $N_1$        | $N_2$ | -           | -           | -     |
| R05605 | $N_1$        | -     | -           | -           | ko    |
| R00351 | -            | $N_2$ | -           | -           | -     |
| R04779 | -            | -     | -           | -           | ko    |
| size   | 5            | 5     | no solution | no solution | 2     |

S4: Relationship among inhibited reactions and predecessors of C00022 in Dataset 2

| Node   | Predecessors |       | IP-FVS1 | IP-FVS2 | IP-EM |
|--------|--------------|-------|---------|---------|-------|
| R00200 | $N_1$        | $N_2$ | ko      | ko      | -     |
| R00220 | $N_1$        | $N_2$ | -       | -       | -     |
| R00214 | $N_1$        | -     | ko      | ko      | ko    |
| R00216 | $N_1$        | -     | ko      | ko      | ko    |
| R01196 | $N_1$        | -     | ko      | ko      | -     |
| R05605 | $N_1$        | -     | ko      | ko      | ko    |
| R00586 | -            | -     | ko      | -       | -     |
| R00945 | -            | -     | ko      | -       | -     |
| R01512 | -            | -     | -       | -       | ko    |
| size   | 6            | 2     | 7       | 5       | 4     |

S5: Relationship among inhibited reactions and predecessors of C00024 in Dataset 2

| Node   | Predecessors |       | IP-FVS1 | IP-FVS2 | IP-EM |
|--------|--------------|-------|---------|---------|-------|
| R00230 | $N_1$        | $N_2$ | ko      | -       | -     |
| R00238 | $N_1$        | -     | ko      | -       | -     |
| R01196 | $N_1$        | -     | ko      | ko      | ko    |
| R00209 | -            | $N_2$ | -       | -       | -     |
| R00351 | -            | $N_2$ | -       | -       | -     |
| R00352 | -            | $N_2$ | -       | -       | -     |
| size   | 3            | 4     | 3       | 1       | 1     |

S6: Relationship among inhibited reactions and predecessors of C00033 in Dataset 2

| Node   | Predecessors |       | IP-FVS1     | IP-FVS2 | IP-EM |
|--------|--------------|-------|-------------|---------|-------|
| R00315 | $N_1$        | $N_2$ | -           | -       | -     |
| R01196 | -            | -     | -           | ko      | ko    |
| size   | 1            | 1     | no solution | 1       | 1     |

S7: Relationship among inhibited reactions and predecessors of C00036 in Dataset 2

| Node   | Predecessors |       | IP-FVS1     | IP-FVS2     | IP-EM |
|--------|--------------|-------|-------------|-------------|-------|
| R00345 | $N_1$        | $N_2$ | -           | -           | ko    |
| R00355 | $N_1$        | -     | -           | -           | -     |
| R00351 | -            | $N_2$ | -           | -           | -     |
| R00352 | -            | $N_2$ | -           | -           | -     |
| size   | 2            | 3     | no solution | no solution | 1     |

S8: Relationship among inhibited reactions and predecessors of C00074 in Dataset 2

| Node   | Predecessors |       | IP-FVS1     | IP-FVS2     | IP-EM |
|--------|--------------|-------|-------------|-------------|-------|
| R00658 | $N_1$        | $N_2$ | -           | -           | -     |
| R00199 | $N_1$        | -     | -           | -           | ko    |
| R00206 | $N_1$        | -     | -           | -           | ko    |
| R01015 | -            | -     | -           | -           | ko    |
| R01829 | -            | -     | -           | -           | ko    |
| R04533 | -            | -     | -           | -           | ko    |
| size   | 3            | 1     | no solution | no solution | 5     |

S9: Relationship among inhibited reactions and predecessors of all the above 5 compounds are targets in Dataset 2

| Node   | Predecessors |       | IP-FVS1     | IP-FVS2     | IP-EM |
|--------|--------------|-------|-------------|-------------|-------|
| R00200 | $N_1$        | $N_2$ | -           | -           | -     |
| R00220 | $N_1$        | $N_2$ | -           | -           | -     |
| R00230 | $N_1$        | $N_2$ | -           | -           | -     |
| R00315 | $N_1$        | $N_2$ | -           | -           | -     |
| R00345 | $N_1$        | $N_2$ | -           | -           | -     |
| R00658 | $N_1$        | $N_2$ | -           | -           | -     |
| R00199 | $N_1$        | -     | -           | -           | -     |
| R00206 | $N_1$        | -     | -           | -           | -     |
| R00214 | $N_1$        | -     | -           | -           | ko    |
| R00216 | $N_1$        | -     | -           | -           | ko    |
| R00238 | $N_1$        | -     | -           | -           | -     |
| R00355 | $N_1$        | -     | -           | -           | -     |
| R01196 | $N_1$        | -     | -           | -           | -     |
| R05605 | $N_1$        | -     | -           | -           | ko    |
| R00209 | -            | $N_2$ | -           | -           | -     |
| R00351 | -            | $N_2$ | -           | -           | -     |
| R00352 | -            | $N_2$ | -           | -           | -     |
| R01512 | -            | -     | -           | -           | ko    |
| size   | 14           | 9     | no solution | no solution | 4     |

S10: Relationship among inhibited reactions and predecessors of C00022 in Dataset 3

| Node   | Predecessors |       | IP-FVS1 | IP-FVS1-approx(10) | IP-FVS2 | IP-FVS2-approx(10) |
|--------|--------------|-------|---------|--------------------|---------|--------------------|
| R00200 | $N_1$        | $N_2$ | ko      | ko                 | -       | ko                 |
| R00212 | $N_1$        | $N_2$ | ko      | ko                 | -       | -                  |
| R00220 | $N_1$        | $N_2$ | ko      | ko                 | -       | -                  |
| R00703 | $N_1$        | $N_2$ | ko      | ko                 | -       | -                  |
| R00782 | $N_1$        | $N_2$ | ko      | ko                 | -       | -                  |
| R02320 | $N_1$        | $N_2$ | ko      | ko                 | -       | -                  |
| R05636 | $N_1$        | $N_2$ | ko      | ko                 | -       | -                  |
| R00214 | $N_1$        | -     | ko      | ko                 | -       | -                  |
| R00470 | $N_1$        | -     | ko      | ko                 | -       | ko                 |
| R00704 | $N_1$        | -     | ko      | ko                 | -       | -                  |
| R03105 | $N_1$        | -     | -       | ko                 | -       | -                  |
| R05605 | $N_1$        | -     | ko      | ko                 | -       | -                  |
| R00258 | -            | $N_2$ | -       | -                  | -       | -                  |
| R00896 | -            | -     | ko      | -                  | -       | -                  |
| R01220 | -            | -     | -       | -                  | -       | ko                 |
| size   | 12           | 8     | 12      | 12                 | NA      | 3                  |

S11: Relationship among inhibited reactions and predecessors of C00024 in Dataset 3

| Node   | Predecessors |       | IP-FVS1 | IP-FVS1-approx(10) | IP-FVS2 | IP-FVS2-approx(10) |
|--------|--------------|-------|---------|--------------------|---------|--------------------|
| R00212 | $N_1$        | $N_2$ | ko      | ko                 | -       | ko                 |
| R00228 | $N_1$        | $N_2$ | ko      | ko                 | -       | -                  |
| R00230 | $N_1$        | $N_2$ | ko      | ko                 | -       | -                  |
| R05351 | $N_1$        | $N_2$ | ko      | ko                 | -       | ko                 |
| R00238 | $N_1$        | -     | ko      | ko                 | -       | -                  |
| R01177 | $N_1$        | -     | ko      | ko                 | -       | -                  |
| R04386 | $N_1$        | -     | ko      | ko                 | -       | -                  |
| R00351 | -            | $N_2$ | -       | -                  | -       | -                  |
| R03026 | -            | -     | -       | -                  | -       | ko                 |
| size   | 7            | 5     | 7       | 7                  | NA      | 3                  |

S12: Relationship among inhibited reactions and predecessors of C00033 in Dataset 3

| Node   | Predecessors |       | IP-FVS1     | IP-FVS1-approx(10) | IP-FVS2 | IP-FVS2-approx(10) |
|--------|--------------|-------|-------------|--------------------|---------|--------------------|
| R00315 | $N_1$        | $N_2$ | -           | -                  | -       | -                  |
| R00317 | $N_1$        | $N_2$ | -           | -                  | -       | -                  |
| R00710 | $N_1$        | $N_2$ | -           | -                  | -       | -                  |
| R00212 | -            | -     | -           | -                  | -       | ko                 |
| R00238 | -            | -     | -           | -                  | -       | ko                 |
| R05351 | -            | -     | -           | -                  | -       | ko                 |
| size   | 3            | 3     | no solution | no solution        | NA      | 3                  |

S13: Relationship among inhibited reactions and predecessors of C00036 in Dataset 3

| Node   | Predecessors |       | IP-FVS1 | IP-FVS1-approx(10) | IP-FVS2 | IP-FVS2-approx(10) |
|--------|--------------|-------|---------|--------------------|---------|--------------------|
| R00345 | $N_1$        | $N_2$ | ko      | ko                 | -       | ko                 |
| R00355 | $N_1$        | $N_2$ | ko      | ko                 | -       | -                  |
| R00357 | $N_1$        | $N_2$ | -       | ko                 | -       | -                  |
| R00351 | -            | $N_2$ | -       | -                  | -       | -                  |
| R00483 | -            | -     | ko      | -                  | -       | -                  |
| R00485 | -            | -     | -       | -                  | -       | ko                 |
| size   | 3            | 4     | 3       | 3                  | NA      | 2                  |
